# Supplementary material for: Quadri-Pulse Theta Burst Stimulation using Ultra-High Frequency Bursts – A New Protocol to Induce Changes in Cortico-Spinal Excitability in Human Motor Cortex
Source: PubMed Central journal article supplement (PMC5158069; doi:10.1371/journal.pone.0168410), 2016-12-15
Supplement: pone.0168410.s001.pdf [file pone.0168410.s001.pdf]

**Individual timecourses of MEP amplitudes after quadri-pulse theta burst stimulation in AP and PA direction for interstimulus intervals of 1.5 ms interburst intervals of 200 ms**

**1a)**

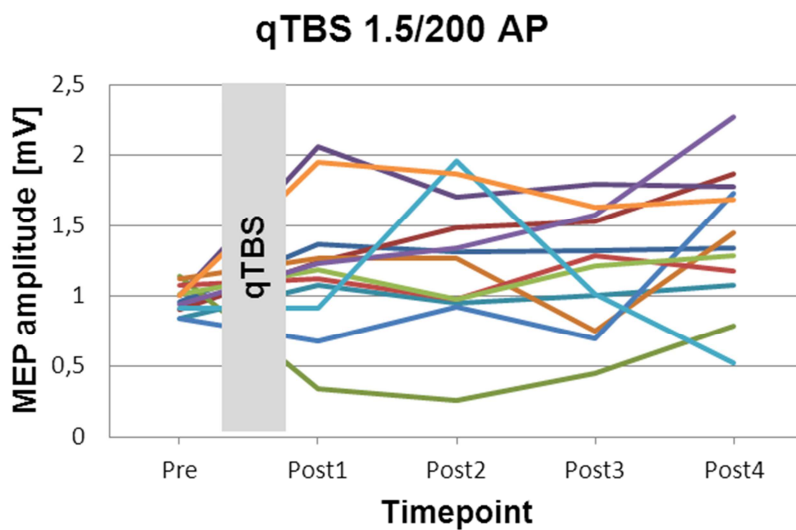

**1b)**

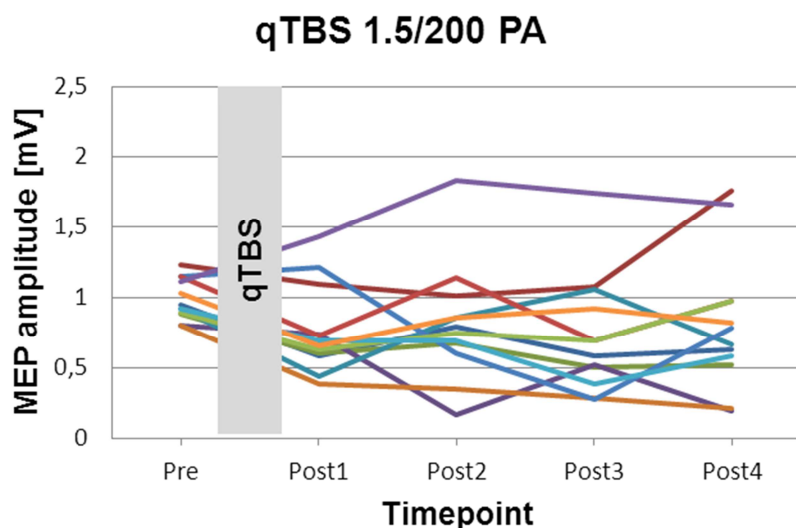

**Figure 1a and b):** Results of individual MEP data after qTBS with interstimulus interval of 1.5 ms in **a)** AP current direction and **b)** PA current direction in the brain. Each coloured line represents one participant. qTBS: quadri-pulse theta burst stimulation; AP: anterior-posterior; PA: posterior-anterior; MEP: motor evoked potential.

**Individual timecourses of MEP amplitudes after quadri-pulse theta burst stimulation in AP and PA direction for interstimulus intervals of 5 ms and interburst intervals of 200 ms**

**2a)**

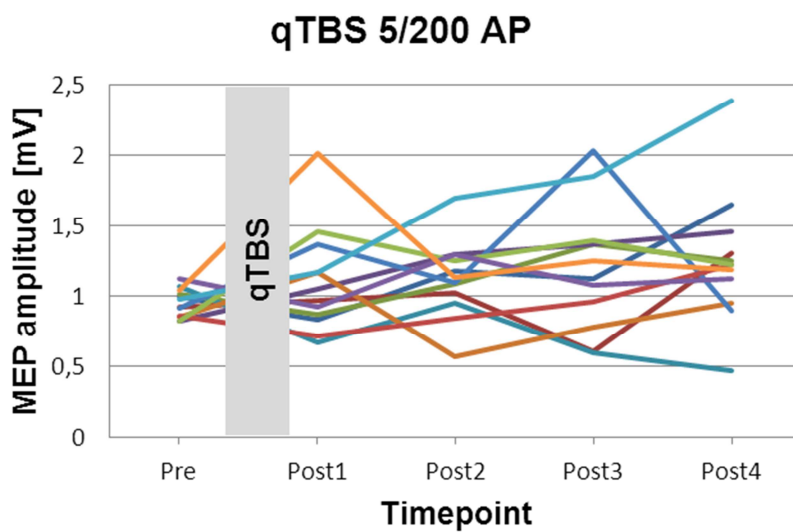

**2b)**

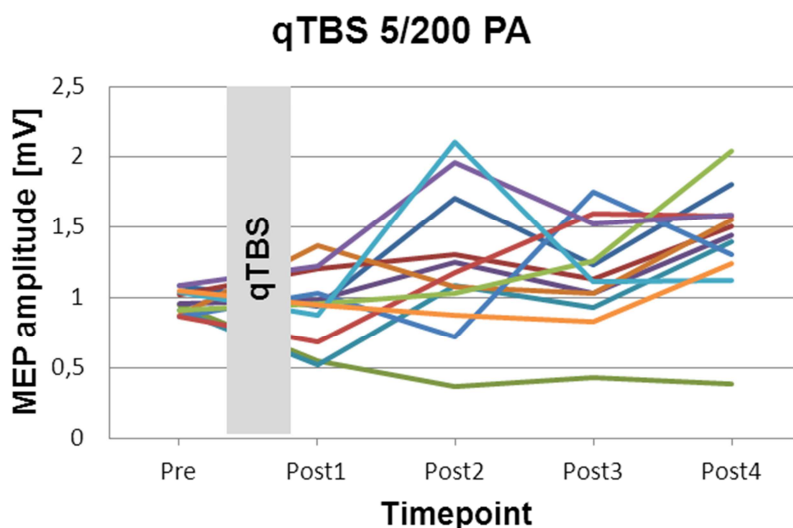

**Figure 2a and b):** Results of individual MEP data after qTBS with interstimulus interval of 5 ms in **a)** AP current direction and **b)** PA current direction in the brain. Each coloured line represents one participant. qTBS: quadri-pulse theta burst stimulation; AP: anterior-posterior; PA: posterior-anterior; MEP: motor evoked potential.
